# Supplementary material for: Two Rare Variants in PLAU and BACE1 Genes—Do They Contribute to Semantic Dementia Clinical Phenotype?
Source: MDPI journal article supplement (doi:10.3390/genes12111806), 2021-11-17
Supplement: s1 [file s1]

## APPENDIX A

### Supplementary files

**Supplementary Table S3:** Control fibroblast lines used for the study

| Control line   | Gender/age<br>of donation | Health status          | reference |
|----------------|---------------------------|------------------------|-----------|
| Control 1 (C1) | F/65                      | Neurologically healthy | [1,2]     |
| Control 2 (C2) | M/69                      |                        |           |
| Control 3 (C3) | F/56                      |                        |           |

**Supplementary Table S4:** Primers used in the study

| Gene                                        | Primer sequences                               | source                                         |
|---------------------------------------------|------------------------------------------------|------------------------------------------------|
| <i>GAPDH</i>                                | GTTCGACAGTCAGCCGCATC<br>GGAATTTGCCATGGGTGGA    | [3,4]                                          |
| <i>PLAU</i>                                 | CCAAAGAAATTCGGAGGGCA<br>CTTGGACAAGCAGCTTTAGGC  | Designed for this study (NCBI primer<br>blast) |
| <i>DSCR1</i>                                | GCACCAGCTCAAGAAGGAACC<br>GGGACTCAAATTTGGCCCTGG | [5]                                            |
| <i>BACE1</i><br>( <i>exon 6F, exon 8R</i> ) | CACCACCAACCTTCGTTTGC<br>AAGCCAATTCGTTTTTCGGGC  | Designed for this study (NCBI primer<br>blast) |
| <i>BACE1</i><br>( <i>exon 3F, exon 9R</i> ) | CAACTGGGAAGGCATCCTGG<br>GCAGGGAGATGTCATCAGCA   | Designed for this study (NCBI primer<br>blast) |

**Supplementary Table S5.** The results of the neuropsychological assessment conducted in the proband's brother at the age of 63 when he presented with restricted behavioral repertoire and marked cognitive rigidity.

| Function assessed / test                                 | Score                | Comments                                                                                                                                                                      |
|----------------------------------------------------------|----------------------|-------------------------------------------------------------------------------------------------------------------------------------------------------------------------------|
| <b>General cognitive status</b>                          |                      |                                                                                                                                                                               |
| ACE-III: orientation and attention / 18                  | 17                   | clearly semantic errors in confrontation naming: penguin was named as "a bird"<br>rhinoceros was named as "wild boar"                                                         |
| ACE-III: memory / 26                                     | 22                   |                                                                                                                                                                               |
| ACE-III: fluency / 14                                    | 14                   |                                                                                                                                                                               |
| ACE-III: language / 26                                   | 24                   |                                                                                                                                                                               |
| ACE-III: visuospatial function / 16                      | 16                   |                                                                                                                                                                               |
| ACE-III total score / 100                                | 93                   | within normal range                                                                                                                                                           |
| Mini-ACE (MACE) total score / 30                         | 24                   | below cut-off                                                                                                                                                                 |
| <b>Language function &amp; visual / verbal semantics</b> |                      |                                                                                                                                                                               |
| <b>Naming</b>                                            |                      |                                                                                                                                                                               |
| BNT / 30                                                 | 19                   | mild anomia                                                                                                                                                                   |
| ACE-III / 12                                             | 10                   |                                                                                                                                                                               |
| <b>Verbal fluency</b> (raw scores / 60s.)                |                      |                                                                                                                                                                               |
| - semantic: animals                                      | 22                   | semantic fluency slightly lower than expected in the context of good phonemic fluency; in fish trial the patient started with aquarium fish in which he has special interest; |
| - fruit & vegetables / fish                              | 16 / 12              |                                                                                                                                                                               |
| phonemic: K / P / S                                      | 18 / 19 / 11         | two incidents of other personal comments during assessment (referring to the patient's dog)                                                                                   |
| <b>Semantics</b>                                         |                      |                                                                                                                                                                               |
| Sydney Language Battery (SYDBAT):                        |                      | naming, word comprehension and semantic association are similarly impaired in SYDBAT which indicates a semantic deficit                                                       |
| - Naming (% correct)                                     | 19 (63%)             |                                                                                                                                                                               |
| - Word Comprehension (% correct)                         | 20 (66%)             |                                                                                                                                                                               |
| - Semantic Association (% correct)                       | 21 (70%)             | in PALS "eagle" was named "flying dinosaur" (after the patient correctly named dinosaur)                                                                                      |
| PALS – animal naming / comprehension                     | 9 / 10               |                                                                                                                                                                               |
| - object naming / comprehension                          | 8/10                 |                                                                                                                                                                               |
| Recognition of famous faces* / 15                        | 14                   |                                                                                                                                                                               |
| Naming famous faces*: spontaneous / cued                 | 7 / 14               | the rhinoceros (drawing to command) lacked any distinctive features, it was drawn as a four-legged domestic animal, resembling a sheep;                                       |
| Drawings: to command / copy                              |                      |                                                                                                                                                                               |
| - guitar:                                                | both correct         | anchor (drawing to command) – only the bottom part was drawn                                                                                                                  |
| - anchor                                                 | incorrect / correct  |                                                                                                                                                                               |
| - lightbulb                                              | simplified / correct |                                                                                                                                                                               |
| - snail                                                  |                      |                                                                                                                                                                               |
| - rhinoceros                                             |                      |                                                                                                                                                                               |

|                                                                                                                                                                                                       |                                                        |                                                                                                                                                                                                                                           |
|-------------------------------------------------------------------------------------------------------------------------------------------------------------------------------------------------------|--------------------------------------------------------|-------------------------------------------------------------------------------------------------------------------------------------------------------------------------------------------------------------------------------------------|
|                                                                                                                                                                                                       | both correct<br>incorrect / correct                    |                                                                                                                                                                                                                                           |
| <b>Language Comprehension</b><br>Commands from BDAE / 15                                                                                                                                              | 15                                                     | preserved                                                                                                                                                                                                                                 |
| <b>Repetition</b><br>Sentence repetition from BDAE<br>high frequency / low frequency (max. 8)                                                                                                         | 8 / 8                                                  | preserved                                                                                                                                                                                                                                 |
| <b>Reading</b><br>Word reading from BDAE / 30<br>Sentence reading from BDAE / 10                                                                                                                      | 30<br>9                                                | one verb distortion in sentence reading                                                                                                                                                                                                   |
| <b>Writing</b><br>Primer level dictation from BDAE / 15<br>Writing words to dictation from BDAE / 10<br>Written confrontation naming / 10<br>Written picture description (beach scene)                | 15<br>10<br>10<br>qualitative                          | writing to dictation was preserved (the testing did not address surface dysgraphia)<br><br>three characters in the beach scene were named "man" (also the boy building a sand castle), the girl were misnamed as a boy                    |
| <b>Other aspects of cognition</b>                                                                                                                                                                     |                                                        |                                                                                                                                                                                                                                           |
| <b>Visuospatial function</b><br>VOSP: Incomplete letters / 20<br>Silhouettes / 30<br>Dot counting / 10<br>Position discrimination / 20<br>Number location / 10<br>Cube analysis / 10<br>CFT copy / 36 | 20<br>8<br>9<br>20<br>10<br>10<br>30                   | mostly preserved;<br><br>the only visual subtest that was failed was the one with semantic involvement (Silhouettes)                                                                                                                      |
| <b>Working memory</b><br>Digit span – max. forward / backward<br>Corsi – max. span forward<br>TMT A<br>TMT B                                                                                          | 4 / 4<br>5<br>80 sec.; 60T<br>129 sec.; 52T ; 0 errors | mostly preserved;<br><br>verbal immediate memory was slightly deficient                                                                                                                                                                   |
| <b>Episodic memory</b><br>Address recall from ACE-III:<br>- learning curve / delayed recall (max. 7)<br>- recognition (max. 5)                                                                        | 6-5-7 / 5<br>5                                         | prose delayed recall was relatively well preserved, but logical error (likely due to a semantic deficit) appeared (the patient recalled that the load was heavier as salt dissolved);<br><br>face delayed recognition was well preserved; |



ACE-III- Addenbrooke's Cognitive Examination-III; BDAE- Boston diagnostic Aphasia Examination; BNT-Boston Naming Test; CFT- Complex Figure Test; PALS – Progressive Aphasia Language Scale; WAB- Western Aphasia Battery; TMT-Trail Making Test; VOSP- Visual Object and Space Perception Test

\*famous face recognition (celebrity recall) and story recall tasks were adapted versions of tasks used in Manchester neuropsychological assessment battery (with permission of Prof. Julie Snowden), see [6]

**Supplementary Table S6:** The proband's results of Addenbrooke's Cognitive Examination-III (ACE-III) from the age of 69 till the age of 73.

|                                     | <i>Age at assessment</i> |                |                |                |
|-------------------------------------|--------------------------|----------------|----------------|----------------|
| ACE-III                             | <i>69 y.o.</i>           | <i>71 y.o.</i> | <i>72 y.o.</i> | <i>73 y.o.</i> |
| orientation and attention (max. 18) | 15 (83%)                 | 8 (44 %)       | 4 (22%)        | 1 (5%)         |
| memory (max. 26)                    | 7 (27%)                  | 8 (31 %)       | 4 (15%)        | 0 (0%)         |
| verbal fluency (max. 14)            | 9 (64%)                  | 5 (36 %)       | 1 (7%)         | 0 (0%)         |
| language (max. 26)                  | 13 (50%)                 | 12 (46 %)      | 9 (35%)        | 1 (4%)         |
| visuospatial function (max. 16)     | 15 (94%)                 | 12 (75%)       | 11 (69%)       | 7 (44%)        |
| total score (max. 100)              | 59                       | 45             | 29             | 9              |
| M-ACE (max. 30)                     | 17                       | 7              | 4              | 0              |

**Supplementary Table S7:** The results of detailed neuropsychological assessment in the proband

|                                                          | 69 y.o.              | 71 y.o.              | 72 y.o.       | 73 y.o.       |
|----------------------------------------------------------|----------------------|----------------------|---------------|---------------|
| <b>Language function &amp; visual / verbal semantics</b> |                      |                      |               |               |
| <b>Naming</b>                                            |                      |                      |               |               |
| BNT / 30                                                 | 2                    | 0                    | -             | -             |
| ACE-III / 12                                             | 3                    | 2                    | 1             | 0             |
| <b>Verbal fluency</b> (raw scores / 60s.)                |                      |                      |               |               |
| - semantic: animals / fruit                              | 9 / 7                | 5 / 4                | 0 / 0         | 0 / -         |
| fish / vegetables / clothes                              | 1 / 8 / 13           | 0 / 0 / 10           | 0 / 0 / 2     | -             |
| - phonemic: K / P / S / M                                | 17 / 23 / 24 / -     | 10 / 13 / 13 / -     | 3 / 4 / - / 3 | 0 / - / - / - |
| <b>Language Comprehension</b>                            |                      |                      |               |               |
| Commands from BDAE / 15                                  | 15                   | 15                   | 13            | 3             |
| <b>Visual and verbal semantics</b>                       |                      |                      |               |               |
| Pyramids and Palm tree test:                             | -                    | 63%                  | 42%           | 62%           |
| - pictorial version (% correct)                          | -                    | 71%                  | 65%           | 58%           |
| - verbal version (% correct)                             |                      |                      |               |               |
| Sydney Language Battery:                                 | 30%                  | 7%                   | 0%            | -             |
| - Naming (% correct)                                     | 53%                  | 37%                  | 33%           | 3%            |
| - Word Comprehension (% correct)                         | 33%                  | 37%                  | 47%           | -             |
| - Semantic Association (% correct)                       |                      |                      |               |               |
| <b>Repetition</b>                                        |                      |                      |               |               |
| Sentence repetition from BDAE                            |                      |                      |               | -             |
| high frequency / low frequency (max. 8)                  | 7 / 8                | 7 / 7                | 7/8           | -             |
| <b>Reading</b>                                           |                      |                      |               |               |
| Word reading from BDAE / 30                              | 30                   | 30                   | 30            | 30            |
| Sentence reading from BDAE / 10                          | 10                   | 10                   | 10            | 10            |
| <b>Writing</b>                                           |                      |                      |               |               |
| Primer level dictation from BDAE / 15                    | -                    | 15                   | 15            | 9             |
| Writing words to dictation from BDAE / 10                |                      | 10                   | 10            | 4             |
| Written confrontation naming / 10                        |                      | 9                    | 5             | -             |
| <b>Other aspects of cognition</b>                        |                      |                      |               |               |
| <b>Visuospatial function</b>                             |                      |                      |               |               |
| VOSP: Incomplete letters / 20                            | 19                   | 19                   | 9             | -             |
| Dot counting / 10                                        | 10                   | 9                    | 10            | 9             |
| Position discrimination / 20                             | 20                   | 20                   | -             | -             |
| Number location / 10                                     | 9                    | 9                    | discontinued  | -             |
| Cube analysis / 10                                       | 8                    | 9                    | 7             | 5             |
| JoLO / 30                                                | -                    | -                    | 22            | -             |
| CFT copy / 36                                            | 34                   | 36                   | 34            | -             |
| <b>Working memory</b>                                    |                      |                      |               |               |
| Digit span – max. forward / backward                     |                      |                      |               | discontinued  |
| Corsi – max. span forward                                | 5 / 3                | 7 / 4                | 6 / 3         | 5             |
| TMT A                                                    | -                    | 5                    | -             | discontinued  |
| TMT B                                                    |                      |                      | 139s., >100T  | -             |
|                                                          | 45s.; 57T            | 120s., >100T         | -             |               |
|                                                          | 216s., 85T, 5 errors | 234s., 89T, 0 errors |               |               |
| <b>Episodic memory</b>                                   |                      |                      |               |               |
| Address recall from ACE-III:                             |                      |                      |               |               |
| - learning curve / delayed recall (max. 7)               | 5-6-7 / 0            | 4-4-6 / 0            | 3-4-4 / 0     | 0-1-0 / 0     |
| - recognition (max. 5)                                   | 0                    | 2                    | 0             | 0             |
| 10-word list learning:                                   |                      |                      |               |               |
| - learning curve                                         | 3-5-6-6-7            | 5-6-3-5-6            | 5-3-3-3-4     | -             |
| - delayed recall                                         | 0                    | 0                    | 0             | -             |
| Recognition: correct / false positives                   | 6 / 3                | 5 / 11               | 7/17          | -             |
| CFT – after 3 min. delay                                 | <20T                 | <20T                 | -             | -             |
| CFT after 30 min. delay                                  | <20T                 | -                    | -             | -             |



|                                                                |           |           |                                                             |       |
|----------------------------------------------------------------|-----------|-----------|-------------------------------------------------------------|-------|
| CFT recognition                                                | <20T      | -         | -                                                           | -     |
| <b>Executive function</b>                                      |           |           |                                                             |       |
| Sorting Weigl blocks                                           | 11 / 15*  | 7 / 9**   | -                                                           | -     |
| Tower of London – DX-2: total correct SS                       | -         | 98        | -                                                           | -     |
| total move SS                                                  | -         | ≤ 60      | -                                                           | -     |
| rule violation SS                                              | -         | ≤ 60      | -                                                           | -     |
| <b>Calculation</b>                                             |           |           |                                                             |       |
| Serial sevens (max. 14)                                        | -         | 12        | -                                                           | -     |
| Calculation from WAB, multiple choice / 24                     | 24        | 24        | 22                                                          | 16*** |
| <b>Motor function and praxis</b>                               |           |           |                                                             |       |
| 9 Hole Peg test                                                | -         | -         | 35s. / 36s.<br>(slowing due to<br>compulsive<br>tendencies) | -     |
| Alternate hand movements                                       | preserved | preserved | preserved                                                   | -     |
| Spatial praxis                                                 | preserved | preserved | preserved                                                   | -     |
| Ideomotor praxis                                               | preserved | preserved | semantic errors                                             | -     |
| Efferent motor praxis:                                         |           |           |                                                             |       |
| - 1 <sup>st</sup> sequence / 2 <sup>nd</sup> sequence (max. 5) | 5/ 5      | 5 / 5     | 4 / 0                                                       | -     |

ACE-III- Addenbrooke's Cognitive Examination-III; BDAE- Boston diagnostic Aphasia Examination;  
BNT-Boston Naming Test; CFT- Complex Figure Test; WAB- Western Aphasia Battery; TMT-Trail  
Making Test; VOSP- Visual Object and Space Perception Test

\*attempting 5 sorting criteria; \*\* attempting 3 sorting criteria; \*\*\*written calculation as the patient  
could not understand the multiple choice procedure

**Supplementary Table S8.** Human Splicing Finder Analysis of BACE1 variant, Fig S4 C: Significant alteration of ESE / ESS motifs ratio according to Human Splice Finder Professional webtool (<https://hsf.genomnis.com/home>)[6]

| Name                         | Position        | Sequence |
|------------------------------|-----------------|----------|
| ESE_ASF (ESE Site Broken)    | chr11:117291048 | CGGAGAA  |
| ESE_ASFB (ESE Site Broken)   | chr11:117291048 | CGGAGAA  |
| PESE (ESE Site Broken)       | chr11:117291048 | CGGAGAAG |
| PESE (New ESE Site)          | chr11:117291048 | TGGAGAAG |
| RESCUE ESE (New ESE Site)    | chr11:117291050 | GATGGA   |
| Sironi_motif2 (New ESS Site) | chr11:117291050 | GATGGAG  |
| Fas ESS (New ESS Site)       | chr11:117291051 | AGATGG   |
| EIE (New ESE Site)           | chr11:117291052 | CAGATG   |
| PESE (ESE Site Broken)       | chr11:117291052 | CAGACGGA |
| ESE_9G8 (ESE Site Broken)    | chr11:117291053 | ACAGAC   |
| ESE_SRp40 (ESE Site Broken)  | chr11:117291053 | ACAGACG  |
| ESE_ASF (New ESE Site)       | chr11:117291054 | CACAGAT  |
| Sironi_motif1 (New ESS Site) | chr11:117291055 | ACACAGAT |

Signal - Alteration of auxiliary sequences      Interpretation - Significant alteration of ESE / ESS motifs ratio (-5)  
Alteration of auxiliary sequences      Significant alteration of ESE / ESS motifs ratio (-5)

**Supplementary Table S9.** Human Splicing Finder Analysis of BACE1 variant, Fig S4 C: Significant alteration of ESE / ESS motifs ratio according to Human Splice Finder Professional webtool (<https://hsf.genomnis.com/home>)[7]

| Name                         | Position        | Sequence |
|------------------------------|-----------------|----------|
| ESE_ASF (ESE Site Broken)    | chr11:117291048 | CGGAGAA  |
| ESE_ASFB (ESE Site Broken)   | chr11:117291048 | CGGAGAA  |
| PESE (ESE Site Broken)       | chr11:117291048 | CGGAGAAG |
| PESE (New ESE Site)          | chr11:117291048 | TGGAGAAG |
| RESCUE ESE (New ESE Site)    | chr11:117291050 | GATGGA   |
| Sironi_motif2 (New ESS Site) | chr11:117291050 | GATGGAG  |
| Fas ESS (New ESS Site)       | chr11:117291051 | AGATGG   |
| EIE (New ESE Site)           | chr11:117291052 | CAGATG   |
| PESE (ESE Site Broken)       | chr11:117291052 | CAGACGGA |
| ESE_9G8 (ESE Site Broken)    | chr11:117291053 | ACAGAC   |
| ESE_SRp40 (ESE Site Broken)  | chr11:117291053 | ACAGACG  |
| ESE_ASF (New ESE Site)       | chr11:117291054 | CACAGAT  |
| Sironi_motif1 (New ESS Site) | chr11:117291055 | ACACAGAT |

Signal - Alteration of auxiliary sequences      Interpretation - Significant alteration of ESE / ESS motifs ratio (-5)  
Alteration of auxiliary sequences      Significant alteration of ESE / ESS motifs ratio (-5)

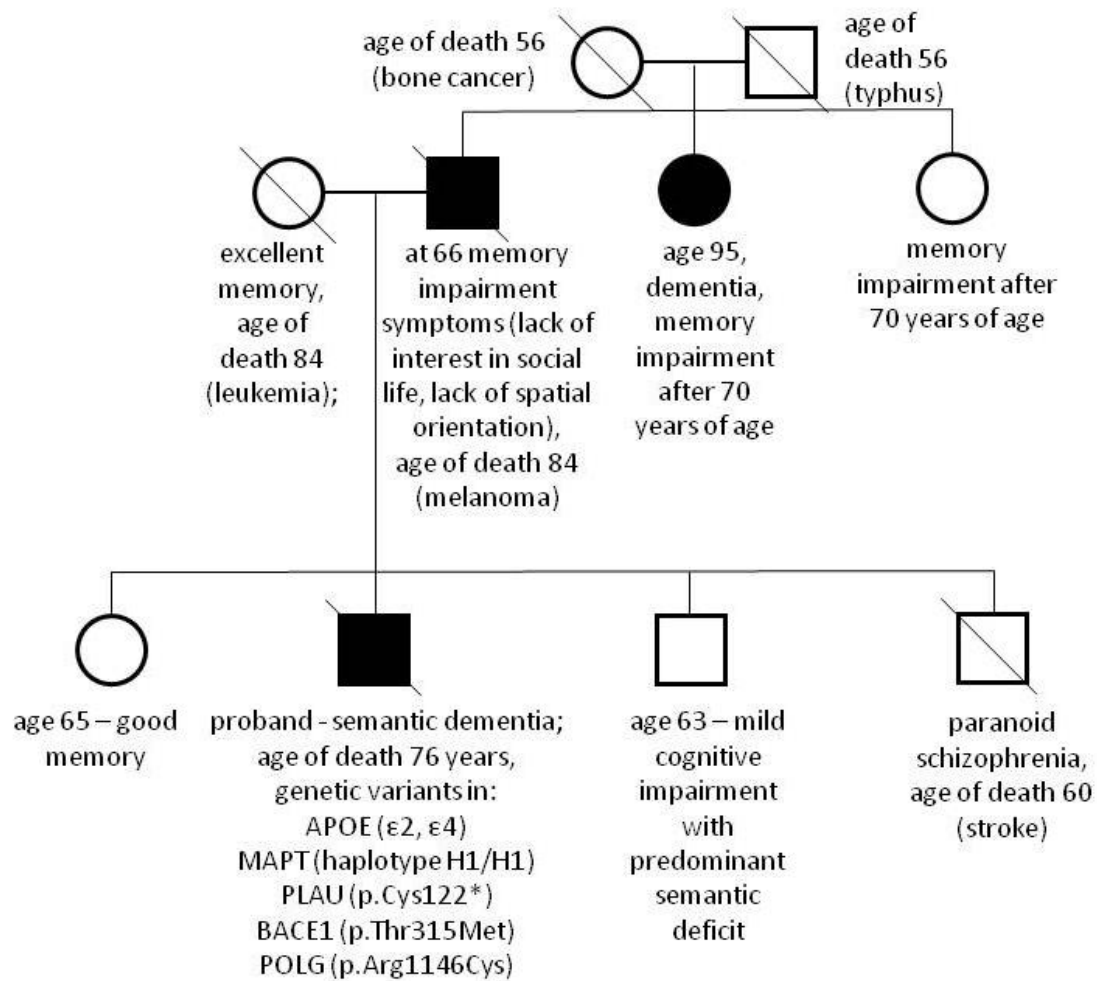

**Supplementary Figure S1:** Family history of the patient;

A)

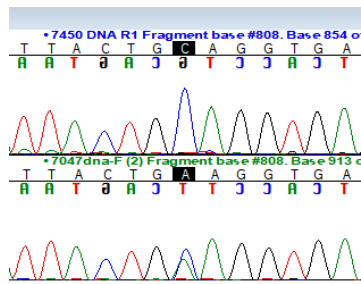

B)

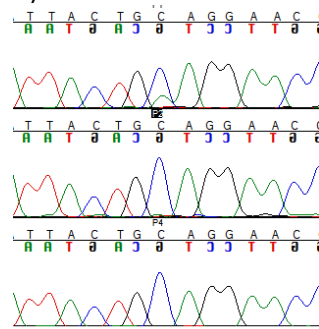

**Supplementary Figure S2.** Sanger sequencing of patient's DNA and cDNA, A) *PLAU* - DNA from control individual and the patient (upper and lower panel, respectively); B): *PLAU* – patient's cDNA after puromycin treatment showing a re-appearance of the allele with the *PLAU* mutation (upper panel), cDNA without treatment from the patient (middle panel) and from control individual (lower panel);

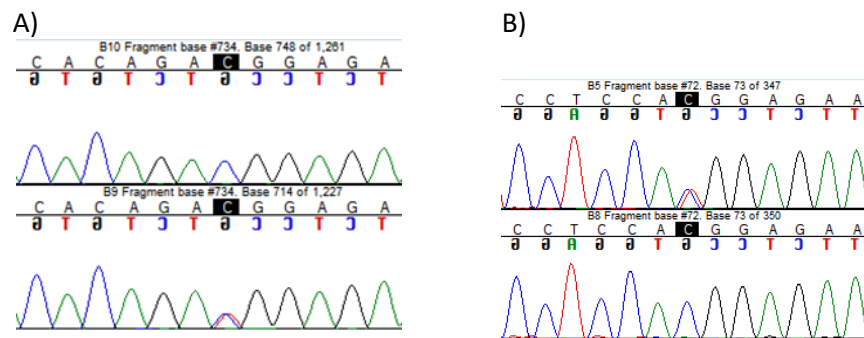

**Supplementary Figure S3.** Sanger sequencing of: A) *BACE1* - DNA from control individual and the patient (upper and lower panel, respectively); B) *BACE1* - patient's cDNA (upper panel); cDNA from the control individual (lower panel)

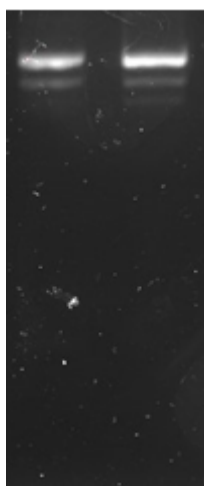

**Supplementary Figure S4.** Agarose gel electrophoresis of the PCR products for patient's cDNA and control's cDNA with BACE1 primers 3F-9R.

#### References:

1. Gaweda-Walerych, K.; Sitek, E.J.; Narozanska, E.; Wezyk, M.; Brockhuis, B.; Zekanowski, C.; Slawek, J. Functional characterization of a novel progranulin mutation in a patient with progressive nonfluent aphasia. *Neurobiol Aging* **2018**, *72*, 186 e189-186 e112,
2. Gaweda-Walerych, K.; Walerych, D.; Berdynski, M.; Buratti, E.; Zekanowski, C. Parkin Levels Decrease in Fibroblasts With Progranulin (PGRN) Pathogenic Variants and in a Cellular Model of PGRN Deficiency. *Front Mol Neurosci* **2021**, *14*, 676478,
3. Gaweda-Walerych, K.; Mohagheghi, F.; Zekanowski, C.; Buratti, E. Parkinson's disease-related gene variants influence pre-mRNA splicing processes. *Neurobiol Aging* **2016**, *47*, 127-138,
4. Chung, S.W.; Choi, B.M.; Kim, J.Y.; Lee, Y.S.; Yoon, J.P.; Oh, K.S.; Park, K.S. Altered Gene and Protein Expressions in Torn Rotator Cuff Tendon Tissues in Diabetic Patients. *Arthroscopy* **2017**, *33*, 518-526 e511,
5. Gong, C.; Kim, Y.K.; Woeller, C.F.; Tang, Y.; Maquat, L.E. SMD and NMD are competitive pathways that contribute to myogenesis: effects on PAX3 and myogenin mRNAs. *Genes Dev* **2009**, *23*, 54-66,
6. Thompson, J.C.; Stopford, C.L.; Snowden, J.S.; Neary, D. Qualitative neuropsychological performance characteristics in frontotemporal dementia and Alzheimer's disease. *J Neurol Neurosurg Psychiatry* **2005**, *76*, 920-927,
7. Desmet, F.O.; Hamroun, D.; Lalande, M.; Collod-Beroud, G.; Claustres, M.; Beroud, C. Human Splicing Finder: an online bioinformatics tool to predict splicing signals. *Nucleic Acids Res* **2009**, *37*, e67,
